# Supplementary material
Source: publisher site journal article supplement (https://www.dovepress.com/article/284557)
Supplement: Supplementary file 1 [file get_supplementary_file.php]

**Appendix 1**- Illustrates a modified patients’ questionnaire criteria for COVID-19 assessment.

Notes: Adapted from Peng X, Xu X, Li Y, et al. Transmission routes of 2019-nCoV and controls in dental practice. *Int J Oral Sci.* 2020;12:9, doi:10.1038/s41368-020-0075-9. Creative Commons Attribution 4.0 International License; http://creativecommons.org/licenses/by/4.0/.1

1. The patient is asked if he/she has displayed fever in the last 14 days?

2. The patient is asked if he/she has experienced respiratory symptoms in the last 14 days?

3. The patient is asked if he/she has visited infected areas considered as red zone areas for SARS- CoV2 transmission in the last 14 days?

4. The patient is asked if he/she has been in contact with known patients who have been infected with SARS- CoV2 in the last 14 days?

5. The patient is asked if he/she been in contact with patients who have visited infected areas considered, to be red zone areas for SARS- CoV2 transmission in the last 14 days?

6. The patient is asked if he/she has been in contact with patients who were experiencing respiratory symptoms in the last 14 days?

7. The patient is asked if he/she has attended reunions or conferences in the last 14 days?

**Reference**

1. Peng X, Xu X, Li Y, et al. Transmission routes of 2019-nCoV and controls in dental practice. *Int J Oral Sci.* 2020;12:9, doi:10.1038/s41368-020-0075-9.
